# Supplementary material for: Unveiling the molecular mechanism of sepal curvature in Dendrobium Section Spatulata through full-length transcriptome and RNA-seq analysis
Source: PubMed Central journal article supplement (PMC11671263; doi:10.3389/fpls.2024.1497230), 2024-12-13
Supplement: DataSheet1.pdf [file DataSheet1.pdf]

## Supplementary Material

### Supplementary Figures

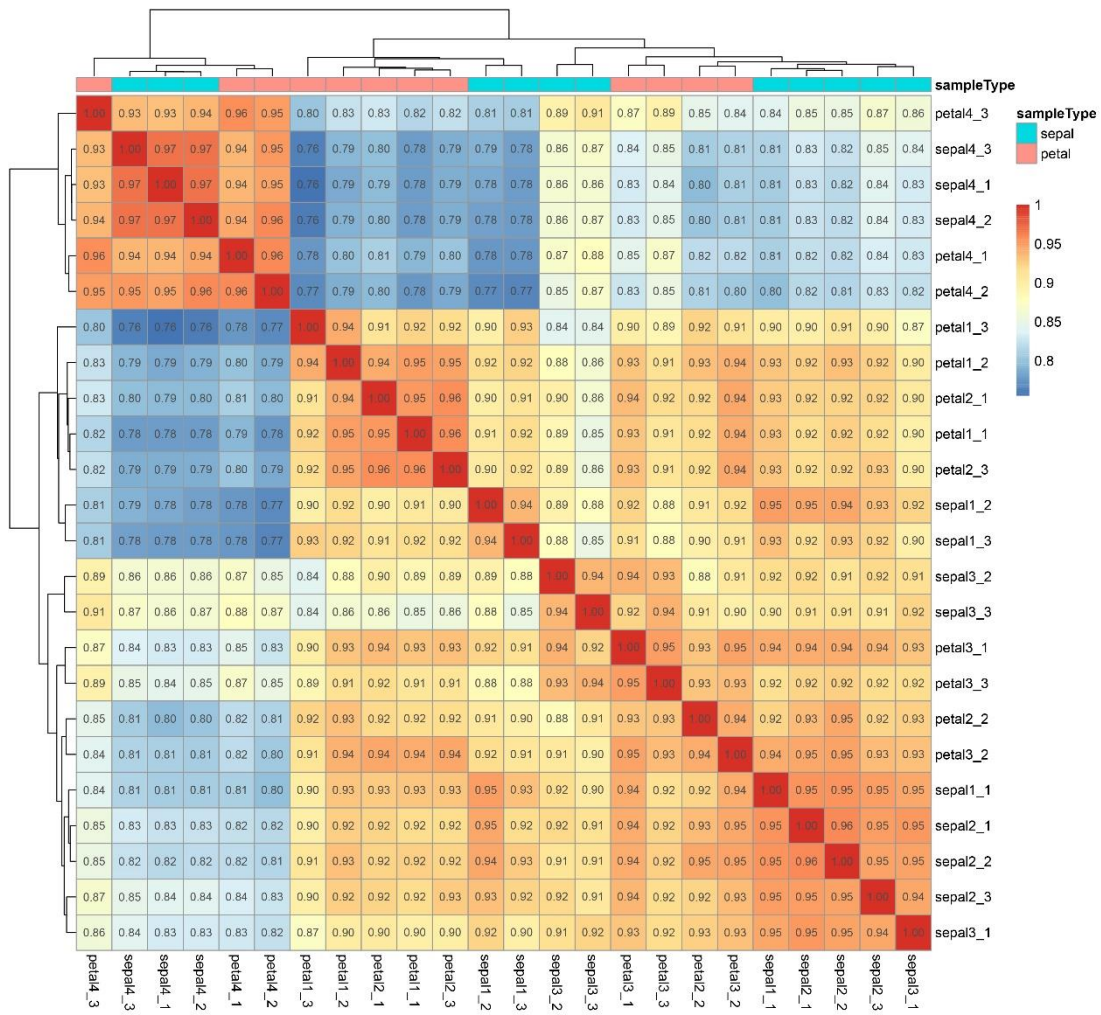

**Supplementary Figure 1.** Correlation of gene expression between RNA-seq samples.

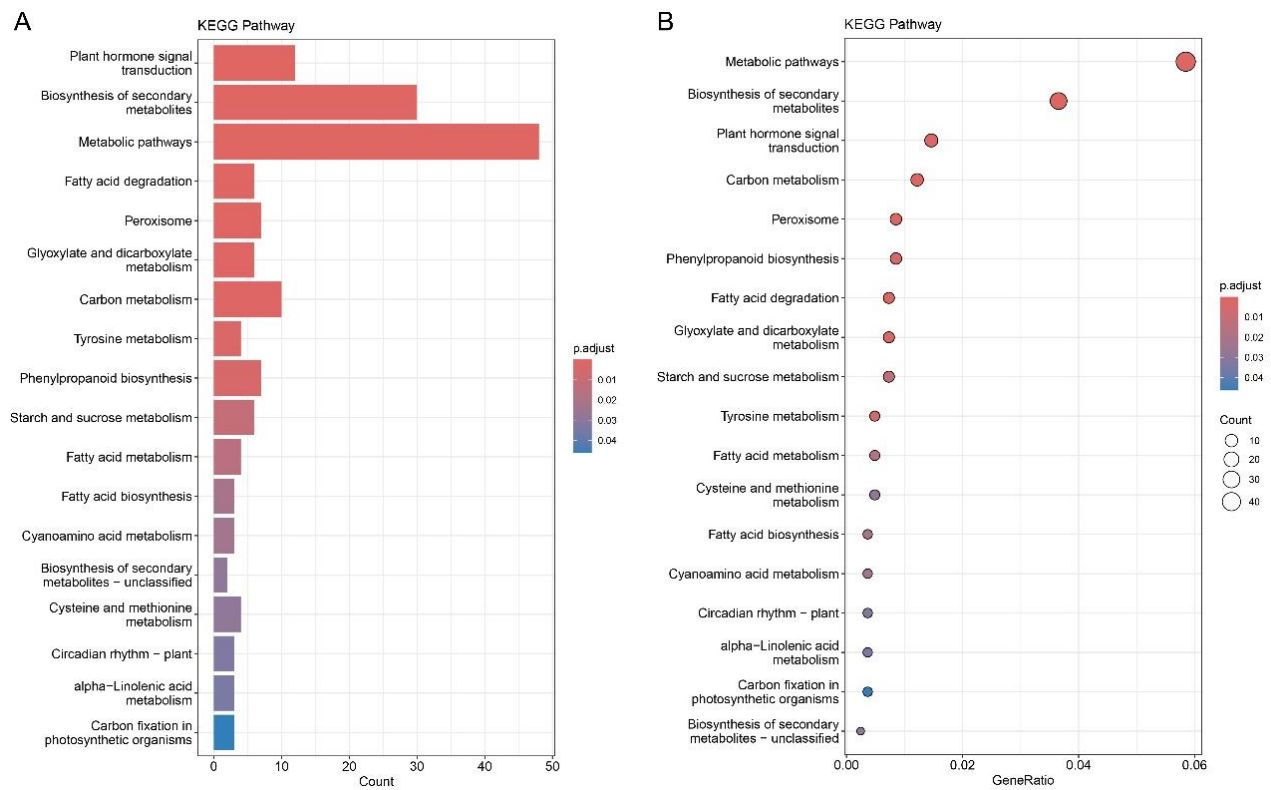

**Supplementary Figure 2.** KEGG pathway enrichment analysis of DEGs. (A) Bar plot of significantly enriched KEGG pathways for all DEGs. (B) Dot plot of significantly enriched KEGG pathways for all DEGs
